# Supplementary material for: A Fusarium graminearum effector protein subverts plant immunity by targeting the TaRPM1–TaHSA32 regulatory axis
Source: Research Square preprint supplement (doi:10.21203/rs.3.rs-8477788/v1), 2026-01-07
Supplement: Supplementary file 1 [file 4d92e9a53cae46f11221d9d4.xlsx]

## Sheet: Supplementary Data 1.
Supplementary Data 1. List of FgUP7 yeast screening libraries
NCBI number	Annoation	Ensemblplants number
XM_044532577.1	Triticum aestivum putative glucose-6-phosphate 1-epimerase	TraesCS5B02G182500.1
XM_044595651.1	Triticum aestivum guanine nucleotide-binding protein subunit beta-like protein A	TraesCS1A02G378000.1
MG560141.1	Triticum aestivum gamma gliadin-B1, gamma gliadin-B2, delta gliadin-B1, gamma gliadin-B4, gamma gliadin-B6, omega gliadin-B3, omega gliadin-B6, LMW-B2, and LMW-B3 genes	TraesCS1B02G010400.1.
XM_044474239.1	Triticum aestivum elongation factor 1-alpha	TraesCS2B02G097300.1
XM_044513381.1	Triticum aestivum glucan endo-1,3-beta-glucosidase-like	TraesCS4B02G142000.1
XM_044494570.1	Triticum aestivum probable E3 ubiquitin-protein ligase RHC1A	TraesCS3B02G361000.1
XM_044525120.1	Triticum aestivum putative glucose-6-phosphate 1-epimerase	TraesCS5A02G184500.2
NM_001427993.1	Triticum aestivum glucan endo-1,3-beta-glucosidase-like	TraesCS4A02G175900.3
XM_044549081.1	Triticum aestivum alcohol dehydrogenase class-3	TraesCS6A02G386600.1
XM_044580377.1	Triticum aestivum ATP-dependent zinc metalloprotease FTSH 1, chloroplastic	TraesCS7B02G471600.1
XM_044492192.1	Triticum aestivum bark storage protein A	TraesCS3B02G181300.1
XM_044520955.1	Triticum aestivum catalase-1-like	TraesCS4D02G322700.1
XM_044547697.1	Triticum aestivum expansin-B3	TraesCS1B02G226000.2
XM_044525036.1	Triticum aestivum ferrochelatase-2, chloroplastic	TraesCS5D02G182100.1
XM_044532335.1	Triticum aestivum histone-lysine N-methyltransferase TRX1	TraesCS5B02G163000.1
XM_044602467.1	Triticum aestivum multiprotein-bridging factor 1a	TraesCS2A02G389000.1
XP_044333921.1	Triticum aestivum disease resistance protein RPM1	TraesCS2B02G435600.1
XM_044464641.1	Triticum aestivum polyphenol oxidase I, chloroplastic	TraesCS2B02G491000.1
XM_044490326.1	Triticum aestivum probable indole-3-acetic acid-amido synthetase GH3.2	TraesCS3B02G335300.1
XM_044563061.1	Triticum aestivum probable thiamine biosynthetic bifunctional enzyme, chloroplastic	TraesCS6D02G136300.1
XM_044540845.1	Triticum aestivum protein C2-DOMAIN ABA-RELATED 11	TraesCS5D02G173700.1
XM_044599314.1	Triticum aestivum ricin B-like lectin R40G2	TraesCS2A02G101700.2
XM_044581755.1	Triticum aestivum RNA-binding protein 42	TraesCS7D02G281800.1
XM_044532838.1	Triticum aestivum thiol protease aleurain	TraesCS5B02G208100.1
XM_044602545.1	Triticum aestivum ubiquitin fusion degradation protein 1 homolog	TraesCS2A02G397100.2
XM_044473381.1	Triticum aestivum uncharacterized protein	TraesCS2D02G558400.1
XM_044478871.1	Triticum aestivum uncharacterized protein	TraesCS2D02G525000.1
XM_044542482.1	Triticum aestivum uncharacterized protein	TraesCS1B02G180500.1
XM_044549233.1	Triticum aestivum uncharacterized protein	TraesCS6D02G388100.2
XM_044563343.1	Triticum aestivum uncharacterized protein	TraesCS6D02G157700.1
XM_044599514.1	Triticum aestivum uncharacterized protein	TraesCS2A02G296900.1
XM_048673977.1	Triticum urartu putative glucose-6-phosphate 1-epimerase	TraesCS5A02G184500.2

## Sheet: Supplementary Data 2.
Supplementary Data 1. List of TaRPM1 yeast screening libraries
Annoation	Ensemblplants number
Triticum aestivum cationic peroxidase SPC4-like	TraesCS7A02G070900
Triticum aestivum protein HEAT-STRESS-ASSOCIATED 32-like	TraesCS7A02G451100
Triticum aestivum ATP synthase subunit beta, mitochondrial-like	TraesCS1A02G379000
Triticum aestivum enolase-like	TraesCS5B02G012300
Triticum aestivum proline dehydrogenase 2, mitochondrial-like	TraesCS1D02G212400
Triticum aestivum cyclin-dependent kinase C-2-like	TraesCS1B02G254800
Triticum aestivum COP9 signalosome complex subunit 3-like	TraesCS7B02G216600
Triticum aestivum nuclear transcription factor Y subunit C-4-like	TraesCS6B02G185700
Triticum aestivum F-box/kelch-repeat protein At1g80440-like	TraesCS7B02G257400
Triticum aestivum phenylalanine ammonia-lyase (PAL)	TraesCS6A02G222800
Triticum aestivum protein DEHYDRATION-INDUCED 19 homolog 2	TraesCS1A02G227200
Triticum aestivum uncharacterized	TraesCS7D02G397500
Triticum aestivum ankyrin repeat protein SKIP35-like	TraesCS4B02G087400
Triticum aestivum transcription repressor OFP8-like	TraesCS3A02G228900
Triticum aestivum glycine-rich RNA-binding protein 2, mitochondrial-like	TraesCS3D02G424100
Triticum aestivum peroxisomal acyl-coenzyme A oxidase 1-like	TraesCS7A02G003900
Triticum aestivum expansin-B4-like	TraesCS1B02G226100
Triticum aestivum 60S ribosomal protein L3-like	TraesCS4B02G111500
Triticum aestivum probable tocopherol cyclase, chloroplastic	TraesCS1B02G236600
Triticum aestivum NAC domain-containing protein 2	TraesCS5B02G480900
Triticum aestivum phytochrome C-like	TraesCS5D02G401000
Triticum aestivum 30S ribosomal protein 3, chloroplastic	TraesCS2D02G324900
Triticum aestivum tubulin alpha chain-like (TUBA)	TraesCS1D02G353100
Triticum aestivum ricin B-like lectin R40C1	TraesCS4A02G130800

## Sheet: Supplementary Data 3.
Supplementary Data 3. Primers used in this study.
FgUP7LF	TGATAGCTAGGTAGACTAGCATTA	Primers used for the construction and verification of the FgUP7 knockout mutant.
FgUP7LR	cggtgagttcaggctttttcatGGTAAATGATACTCTGTGAGG
FgUP7LFNest-HYG_F	CCTCACAGAGTATCATTTACCatgaaaaagcctgaactcaccg
NYGFNest	GAATCGGTCAATACACTACATGGCG
HYRNest	AACCACGGCCTCCAGAAGAAGAT
FgUP7RRNest-HYG_R	TGTTTAGCCTTTTGCAGCATCctattcctttgccctcggacga
FgUP7RF	tcgtccgagggcaaaggaatagGATGCTGCAAAAGGCTAAACA
FgUP7RR	TGTTTGTCCTTCGTGGCGAGA
UP7-C-F	agggaacaaaagctgggtaccTGATAGCTAGGTAGACTAGCATTA	Primers for the construction of the FgUP7 complement strain.
UP7-C-R	GAACAGCTCCTCGCCCTTGCTCACCAGCTCGTCTGAGACCGAATC
UP7-pSUC2-F	tccaagctcggaattttaattaagaattcATGTTGTTCAAGTCCATCTTCATCTCG	For cloning into the pSUC2 vector and subsequent identification of signal peptide secretion activity.
UP7-pSUC2-R	atacgactcactatagggagaacctcgagTAGGTAAATGGCCAGAGCACTAGT
UP7-YCE-xba1-F1	gagaacacgggggactctagaATGATTTACCTACCCGAA	For construction of the BiFC vector and protein-protein interaction assay.
UP7-YCE-Spe1-R1	gtactatcgatggatccactagtCAGCTCGTCTGAGACC
UP7-YNE-xba1-F1	gagaacacgggggactctagaATGATTTACCTACCCGAA
UP7-YNE-Kpn1-R1	ctccatcccgggagcggtaccCAGCTCGTCTGAGACCGA
BdRPM1-CC-YCE-xba1-F	gagaacacgggggactctagaATGGACCTCTCCTCTCTCGTCGCC
BdRPM1-CC-YCE-Spe1-R	gtactatcgatggatccactagtGATTTCCTCGTCCTCCACGAA
BdRPM1-LRR-YCE-xba1-F	gagaacacgggggactctagaATGATGACCTTGCTTCGCACCTTT
BdRPM1-LRR-YCE-Spe1-R	gtactatcgatggatccactagtAGACCGGCGTCTAAACACTAT
BdRPM1-NB-ARC-YCE-xba1-F	gagaacacgggggactctagaATGGACGAGGAAATCGTCGGCTTT
BdRPM1-NB-ARC-YCE-Spe1-R	gtactatcgatggatccactagtCAACAGGCTACGGTGCACTA
BdRPM1-YCE-xba1-F	gagaacacgggggactctagaATGGCGGAAATGATCGCG
BdRPM1-YCE-Spe1-R	gtactatcgatggatccactagtCTACTTCTGAACATCAAATAGGTTGGT
BdHSA32-YCE-xba1-F	gagaacacgggggactctagaATGAGGCGGTGGAGAGAG
BdHSA32-YCE-Spe1-R	gtactatcgatggatccactagtTCACATCAGGAAGAACGGAGA
TaRPM1-YCE-xba1-F	gagaacacgggggactctagaATGGCCGAGATGATCGCG
TaRPM1-YCE-Spe1-R	gtactatcgatggatccactagtCATTTGAACAGTGAATAGGTTGGTG
TaHSA32-YNE-XBA1-F	gagaacacgggggactctagaATGAGGGGGTGGAGAGAG
TaHSA32-YNE-Kpn1-R	ctccatcccgggagcggtaccTCACATCAGGAAGAACGGCGA
BdHSA32-YNE-XBA1-F	gagaacacgggggactctagaATGAGGCGGTGGAGAGAG
BdHSA32-YNE-Kpn1-R	ctccatcccgggagcggtaccTCACATCAGGAAGAACGGAGA
BdRPM1-CCYNE-XBA1-F	gagaacacgggggactctagaATGGACCTCTCCTCTCTCGTCGCC
BdRPM1-CCYNE-Kpn1-R	ctccatcccgggagcggtaccGATTTCCTCGTCCTCCACGAA
BdRPM1-LRRYNE-XBA1-F	gagaacacgggggactctagaATGATGACCTTGCTTCGCACCTTT
BdRPM1-LRRYNE-Kpn1-R	ctccatcccgggagcggtaccAGACCGGCGTCTAAACACTAT
BdRPM1-NB-ARCYNE-XBA1-F	gagaacacgggggactctagaATGGACGAGGAAATCGTCGGCTTT
BdRPM1-NB-ARCYNE-Kpn1-R	ctccatcccgggagcggtaccCAACAGGCTACGGTGCACTA
BdRPM1-YNE-XBA1-F	gagaacacgggggactctagaATGGCGGAAATGATCGCG
BdRPM1-YNE-Kpn1-R	ctccatcccgggagcggtaccCTACTTCTGAACATCAAATAGGTTGGT
cL UP7 kpn1 F	tacgcgtcccggggcggtaccATGATTTACCTACCCGAAAAC	For cloning into the pCAMBIA1300-cLuc vector for the LUC complementation imaging (LCI) assay.
cL UP7 sal1 R	acgaaagctctgcaggtcgacCAGCTCGTCTGAGACCGA
cL Kpn1 TaHSA F	tacgcgtcccggggcggtaccATGAGGGGGTGGAGAGAG
cL Sal1 TaHSA R	acgaaagctctgcaggtcgacTCACATCAGGAAGAACGGCGA
nL kpn1 TaHSA F	acgggggacgagctcggtaccATGAGGGGGTGGAGAGAG
nL sal1 TaHSA R	cgcgtacgagatctggtcgacTCACATCAGGAAGAACGGCGA
cL kpn1 TaHSA F	tacgcgtcccggggcggtaccATGAGGGGGTGGAGAGAG
cL sal1 TaHSA R	acgaaagctctgcaggtcgacTCACATCAGGAAGAACGGCGA
cL402B TaRPM1-	tacgcgtcccggggcggtaccATGTTGCAGGATGGGGAGATCGT
cLTaRPM1-NB R	acgaaagctctgcaggtcgacCCGTTTCGCTCGTCCAAACTC
cLTaRPM1-LRR F	tacgcgtcccggggcggtaccATGACATTGCTTCGCTCCTTC
cLTaRPM1-LRR R	acgaaagctctgcaggtcgacTGGCATTTCAAAAAGCTCAAGGT
cLTaRPM1-CC F	tacgcgtcccggggcggtaccATGGTCGCCGCAACGCTGTCGCGC
cLTaRPM1-CC R	acgaaagctctgcaggtcgacGAAGTTAGCGCAGGCGCG
cL BamH1 TaRPM1-F	tacgcgtcccggggcggtaccATGGCCGAGATGATCGCG
cL sal1TaRPM1-R	acgaaagctctgcaggtcgacCATTTGAACAGTGAATAGGTTGGTG
nLTaRPM1-NB kpn1 F	acgggggacgagctcggtaccATGTTGCAGGATGGGGAGATCGT	For cloning into the pCAMBIA1300-nLuc vector for the LUC complementation imaging (LCI) assay.
nLTaRPM1-NB R	cgcgtacgagatctggtcgacCCGTTTCGCTCGTCCAAACTC
nLTaRPM1-LRR kpn1 F	acgggggacgagctcggtaccATGACATTGCTTCGCTCCTTC
nLTaRPM1-LRR R	cgcgtacgagatctggtcgacTGGCATTTCAAAAAGCTCAAGGT
nLTaRPM1-CC kpn1 F	acgggggacgagctcggtaccATGGTCGCCGCAACGCTGTCGCGC
nLTaRPM1-CC R	cgcgtacgagatctggtcgacGAAGTTAGCGCAGGCGCG
nL kpn1 TaRPM1-F	acgggggacgagctcggtaccATGGCCGAGATGATCGCG
nL sal1 TaRPM1-R	cgcgtacgagatctggtcgacCATTTGAACAGTGAATAGGTTGGTG
MBP-UP7-F	gagggaaggatttcagaattcATGATTTACCTACCCGAA	For cloning into the pMAL-c2X vector for prokaryotic inducible protein expression.
MBP-UP7-R	tgcctgcaggtcgactctagaCTACAGCTCGTCTGAGAC
MBP-TaRPM1-NB-ARC-F	gagggaaggatttcagaattcATGTTGCAGGATGGGGAGATCGT
MBP-TaRPM1-NB-ARC-R	tgcctgcaggtcgactctagaCCGTTTCGCTCGTCCAAACTC
MBP-TaRPM1-LRR-F	gagggaaggatttcagaattcATGACATTGCTTCGCTCCTTC
MBP-TaRPM1-LRR-R	tgcctgcaggtcgactctagaTGGCATTTCAAAAAGCTCAAGGT
MBP-TaRPM1-CC-F	gagggaaggatttcagaattcATGGTCGCCGCAACGCTGTCGCGC
MBP-TaRPM1-CC-R	tgcctgcaggtcgactctagaGAAGTTAGCGCAGGCGCG
MBP-TaRPM1-F	gagggaaggatttcagaattcATGGCCGAGATGATCGCG
MBP-TaRPM1-R	tgcctgcaggtcgactctagaCATTTGAACAGTGAATAGGTTGGTG
MBP-TaHSA32-F	gagggaaggatttcagaattcATGAGGGGGTGGAGAGAG
MBP-TaHSA32-R	tgcctgcaggtcgactctagaTCACATCAGGAAGAACGGCGA
GST-TaRPM1-NB-ARC--F	gatctggttccgcgtggatccATGTTGCAGGATGGGGAGATCGT	For cloning into the pGEX4T1 vector for prokaryotic inducible protein expression.
GST-TaRPM1-NB-ARC--R	ctcgagtcgacccgggaattcCCGTTTCGCTCGTCCAAACTC
GST-TaRPM1-LRR--F	gatctggttccgcgtggatccATGACATTGCTTCGCTCCTTC
GST-TaRPM1-LRR--R	ctcgagtcgacccgggaattcTGGCATTTCAAAAAGCTCAAGGT
GST-TaRPM1-CC--F	gatctggttccgcgtggatccATGGTCGCCGCAACGCTGTCGCGC
GST-TaRPM1-CC--R	ctcgagtcgacccgggaattcGAAGTTAGCGCAGGCGCG
GST-TaRPM1--F	gatctggttccgcgtggatccATGGCCGAGATGATCGCG
GST-TaRPM1--R	ctcgagtcgacccgggaattcCATTTGAACAGTGAATAGGTTGGTG
HIS-TaRPM1-CC-F	ggtggaagtggtggatccATGGTCGCCGCAACGCTGTCGCGC	For cloning into the pET32a vector for prokaryotic inducible protein expression.
HIS-TaRPM1-CC-R	tccagatccaccgtcgacGAAGTTAGCGCAGGCGCG
HIS-TaHSA32-F	ggtggaagtggtggatccATGAGGGGGTGGAGAGAG
HIS-TaHSA32-R	tccagatccaccgtcgacTCACATCAGGAAGAACGGCGA
HIS-FgUP7-F	ggtggaagtggtggatccATGATTTACCTACCCGAAAAC
HIS-FgUP7-R	tccagatccaccgtcgacCAGCTCGTCTGAGACCGA
BD-TaRPM1 F	atggccatggaggccgaattcATGGCCGAGATGATCGCG	For cloning into the pGBKT7 vector for the yeast two-hybrid (Y2H) assay.
BD-TaRPM1 R	tcgacggatccccgggaattcCTACATTTGAACAGTGAA
BD-TaRPM1-NB-ARC--F	atggccatggaggccgaattcATGTTGCAGGATGGGGAGATCGT
BD-TaRPM1-NB-ARC--R	tcgacggatccccgggaattcCCGTTTCGCTCGTCCAAACTC
BD-TaRPM1-LRR--F	atggccatggaggccgaattcATGACATTGCTTCGCTCCTTC
BD-TaRPM1-LRR--R	tcgacggatccccgggaattcTGGCATTTCAAAAAGCTCAAGGT
BD-TaRPM1-CC--F	atggccatggaggccgaattcATGGTCGCCGCAACGCTGTCGCGC
BD-TaRPM1-CC--R	tcgacggatccccgggaattcGAAGTTAGCGCAGGCGCG
BD-TaRPM1-CC1-35--F	atggccatggaggccgaattcATGGTCGCCGCAACGCTGTCGCGC
BD-TaRPM1-CC1-35--R	tcgacggatccccgggaattcGCGGGAGTCGGCGAACCGGAG
BD-TaRPM1-CC24-66--F	atggccatggaggccgaattcATGGCGCGGGACCTGGAGCTCCTC
BD-TaRPM1-CC24-66--R	tcgacggatccccgggaattcGTCCGCGGCGTCCTCCAGCTC
BD-TaRPM1-CC51-88--F	atggccatggaggccgaattcATGGTGGACCAGATCCGGGACGTC
BD-TaRPM1-CC51-88--R	tcgacggatccccgggaattcAGCGAGCCACGCGCCGAAGTT
BD-TaHSA32-F	atggccatggaggccgaattcATGAGGGGGTGGAGAGAG
BD-TaHSA32-R	tcgacggatccccgggaattcTCACATCAGGAAGAACGGCGA
BD-FgUP7-F	atggccatggaggccgaattcATGATTTACCTACCCGAAAAC
BD-FgUP7-R	tcgacggatccccgggaattcCAGCTCGTCTGAGACCGA
BD BdRPM1 F	atggccatggaggccgaattcATGGCGGAAATGATCGCG
BD BdRPM1 R	tcgacggatccccgggaattcCTACTTCTGAACATCAAATAGGTTGGT
BD BdRPM1-CC F	atggccatggaggccgaattcATGGACCTCTCCTCTCTCGTCGCC
BD BdRPM1-CC R	tcgacggatccccgggaattcGATTTCCTCGTCCTCCACGAA
BD BdRPM1-LRR F	atggccatggaggccgaattcATGATGACCTTGCTTCGCACCTTT
BD BdRPM1-LRR R	tcgacggatccccgggaattcAGACCGGCGTCTAAACACTAT
BD BdRPM1-NB-ARC F	atggccatggaggccgaattcATGGACGAGGAAATCGTCGGCTTT
BD BdRPM1-NB-ARC R	tcgacggatccccgggaattcCAACAGGCTACGGTGCACTA
AD-TaRPM1-NB-ARC--F	gccatggaggccagtgaattcATGTTGCAGGATGGGGAGATCGT	For cloning into the pGT7-AD vector for the yeast two-hybrid (Y2H) assay.
AD-TaRPM1-NB-ARC--R	atgcccacccgggtggaattcCCGTTTCGCTCGTCCAAACTC
AD-TaRPM1-LRR--F	gccatggaggccagtgaattcATGACATTGCTTCGCTCCTTC
AD-TaRPM1-LRR--R	atgcccacccgggtggaattcTGGCATTTCAAAAAGCTCAAGGT
AD-TaRPM1-CC--F	gccatggaggccagtgaattcATGGTCGCCGCAACGCTGTCGCGC
AD-TaRPM1-CC--R	atgcccacccgggtggaattcGAAGTTAGCGCAGGCGCG
AD-TaRPM1 F	gccatggaggccagtgaattcATGGCCGAGATGATCGCG
AD-TaRPM1 R	atgcccacccgggtggaattcCTACATTTGAACAGTGAA
AD-TaRPM1-CC1-35--F	gccatggaggccagtgaattcATGGTCGCCGCAACGCTGTCGCGC
AD-TaRPM1-CC1-35--R	atgcccacccgggtggaattcGCGGGAGTCGGCGAACCGGAG
AD-TaRPM1-CC24-66--F	gccatggaggccagtgaattcATGGCGCGGGACCTGGAGCTCCTC
AD-TaRPM1-CC24-66--R	atgcccacccgggtggaattcGTCCGCGGCGTCCTCCAGCTC
AD-TaRPM1-CC51-88--F	gccatggaggccagtgaattcATGGTGGACCAGATCCGGGACGTC
AD-TaRPM1-CC51-88--R	atgcccacccgggtggaattcAGCGAGCCACGCGCCGAAGTT
AD-TaHSA32-F	gccatggaggccagtgaattcATGAGGGGGTGGAGAGAG
AD-TaHSA32-R	atgcccacccgggtggaattcTCACATCAGGAAGAACGGCGA
AD-FgUP7-F	gccatggaggccagtgaattcATGATTTACCTACCCGAAAAC
AD-FgUP7-R	atgcccacccgggtggaattcCAGCTCGTCTGAGACCGA
AD-BdHSA32-F	gccatggaggccagtgaattcATGAGGCGGTGGAGAGAG
AD-BdHSA32-R	atgcccacccgggtggaattcTCACATCAGGAAGAACGGAGA
HA-TaRPM1-CC--F	ggtggaagtggtggatATGGTCGCCGCAACGCTGTCGCGC	For the detection of cell necrosis and reactive oxygen species (ROS) accumulation.
HA-TaRPM1-CC--R	tccagatccaccgtcgacGAAGTTAGCGCAGGCGCG
HA-TaRPM1 F	ggtggaagtggtggatATGGCCGAGATGATCGCG
HA-TaRPM1 R	tccagatccaccgtcgacCTACATTTGAACAGTGAA
HA-TaHSA32-F	ggtggaagtggtggatATGAGGGGGTGGAGAGAG
HA-TaHSA32-R	tccagatccaccgtcgacTCACATCAGGAAGAACGGCGA
HA-FgUP7-F	ggtggaagtggtggatATGATTTACCTACCCGAAAAC
HA-FgUP7-R	tccagatccaccgtcgacCAGCTCGTCTGAGACCGA
TaRPM1-GFP-F	TTACGAACGATAGCCGGTACCATGGCCGAGATGATCGCG	For cloning into the GFP vector to assess subcellular localization and cell necrosis in N. benthamiana.
TaRPM1-GFP-R	gctcaccatCCCGGGGGTACCCATTTGAACAGTGAATAGGTTGGTG
TaRPM1-CC-GFP-F	TTACGAACGATAGCCGGTACCATGGTCGCCGCAACGCTGTCGCGC
TaRPM1-CC-GFP-R	gctcaccatCCCGGGGGTACCGAAGTTAGCGCAGGCGCG
TaRPM1-NB-ARC-GFP-F	TTACGAACGATAGCCGGTACCATGTTGCAGGATGGGGAGATCGT
TaRPM1-NB-ARC-GFP-R	gctcaccatCCCGGGGGTACCCCGTTTCGCTCGTCCAAACTC
TaRPM1-LRR-GFP-F	TTACGAACGATAGCCGGTACCATGACATTGCTTCGCTCCTTC
TaRPM1-LRR-GFP-R	gctcaccatCCCGGGGGTACCTGGCATTTCAAAAAGCTCAAGGT
TaRPM1-2A-GFP-F	TTACGAACGATAGCCGGTACCATGGCGGAGATGATCGCG
TaRPM1-2A-GFP-R	gctcaccatCCCGGGGGTACCCATTTGAACTGTGAATAG
TaRPM1-2D-GFP-F	TTACGAACGATAGCCGGTACCATGGCGGAGATGATCGCG
TaRPM1-2D-GFP-R	gctcaccatCCCGGGGGTACCGGGTAAGATGTAACAGCC
BdRPM1-GFP-F	TTACGAACGATAGCCGGTACCATGGCGGAAATGATCGCG
BdRPM1-GFP-R	gctcaccatCCCGGGGGTACCCTACTTCTGAACATCAAATAGGTTGGT
FgUP7-GFP-F	TTACGAACGATAGCCGGTACCATGTTGTTCAAGTCCATCTTCATCTCG
FgUP7-GFP-R	gctcaccatCCCGGGGGTACCCAGCTCGTCTGAGACCGA
FgUP7-∆SP-GFP-F	TTACGAACGATAGCCGGTACCATGATTTACCTACCCGAAAAC
FgUP7-∆SP-RFP-F	TTACGAACGATAGCCGGTACCATGATTTACCTACCCGAAAAC	For cloning into the RFP vector to assess subcellular localization and cell necrosis in N. benthamiana.
FgUP7-∆SP-RFP-R	TAGCTTTTGTTCCATGGTACCCAGCTCGTCTGAGACCGA
TaHSA32-RFP-F	TTACGAACGATAGCCGGTACCATGAGGGGGTGGAGAGAG
TaHSA32-RFP-R	TAGCTTTTGTTCCATGGTACCTCACATCAGGAAGAACGGCGA
BdHSA32-RFP-F	TTACGAACGATAGCCGGTACCATGAGGCGGTGGAGAGAG
BdHSA32-RFP-R	TAGCTTTTGTTCCATGGTACCTCACATCAGGAAGAACGGAGA
TaActin-F	AGTCGAGAACGATACCAGTAGTACGA	For real-time quantitative PCR (RT-qPCR) amplification.
TaActin-R	GCCATGTACGTCGCAATTCA
FgACT-F	GTATGTGCAAGGCCGGTTTC
FgACT-F	ACTGAGCCTCATCACCAACG
RT-TaPR1-F	GACTTCGTCAACCTGCACAA
RT-TaPR1-R	GCCGGAATGTGTGCTTATTT
RT-TaMAPK3-F	ACCCTTACCTAGAGCGGCTTC
RT-TaMAPK3-R	ACTCCAGGGCTTCGTTGAATA
RT TaFLS2-like F	CGACGTCTCTGACGAATCTTG
RT TaFLS2-like R	GTTGTGGATGACGAGCTTCTG
RT NbActin F	ACCATCAATGATCGGAATGG
RT NbActin R	GCTCATCCTATCAGCAATGC
RT NbPR1 F	GTTGAGATGTGGGTCGATGAG
RT NbPR1 R	TACGCCAAACCACTTGAGTATAG
RT-NbPAD4-F	GGACTCACACTCCAGCGTTT
RT-NbPAD4-R	GGCAACTCATCCTCTTCCTG
RT-FgUP7-F	GTGGTACAACTCCACCGAGG
RT-FgUP7-R	ACAAGTGTACCGGGCATCAG
RT- TaRPM1 F	CCGTCTCCAAGAACTTCACTAC
RT-TaRPM1 R	GGTAGTCCATCTCGTCAATGTC
RT-TaHSA32 F	GTATGTGAGCACTGGTGACTG
RT-TaHSA32 R	GGTGTCGAATCCCAACTCTTT
TaRPM1-UBI-F	ATTTACAATTACCATACTAGT	For the generation of transgenic materials and characterization of editing genotypes in wheat (ecotype Fielder).
TaRPM1-UBI-R	GTCCTTGTAGTCCATACTAGT
TaHSA32-UBI-F	ATTTACAATTACCATACTAGT
TaHSA32-UBI-R	GTCCTTGTAGTCCATACTAGT
Ta40-TaU3p-R-TS	ACGTCCCGGATCTGGTCCACTGCTACCTCAGGATGCGCC
Ta40-TS-Optimized sgRNA-F	GTGGACCAGATCCGGGACGTGTTTCAGAGCTATGCTGGAAACAGCATAGC
TaHSA32TaU3p-R-TS	GTGCTCACATACATGTCATGTGCTACCTCAGGATGCGCC
TaHSA32-TS-Optimized sgRNA-F	CATGACATGTATGTGAGCACGTTTCAGAGCTATGCTGGAAACAGCATAGC
TaRPM1-2A-CAS-F2	AGAATCGCTGACTTGCCACA
TaRPM1-2A-CAS-R2	CTAGCTTCTGGCCTACGACG
TaRPM1-2B-CAS-F2	CGATATCGCTCTCGGCGAA
TaRPM1-2B-CAS-R2	GAAGGCGTACTCGTCCGCG
TaRPM1-2D-CAS-F2	CTCACGTACAGCGAGGTCAT
TaRPM1-2D-CAS-R2	ACCAGAGTGGTCTTGCCAAC
TaHSA-7A-CAS-F1	CAGATTCTCAAGCCAGCCGT
TaHSA-7A-CAS-R1	CAGTGGAACGGTAGTGCTTCT
TaHSA7b cas9 R2	CGTTCTGCGGTTTCAAGGAG
TaHSA7b cas9 F2	TCAGACTCCCTGCTGTACCA
TaHSA7D cas9 F3	CAGATTCTCAAGCCAGCCGT
TaHSA7D cas9 R3	GAGTACAGTGGAAAGGTAGTGC
BdRPM1-sgRNA-FP1	tgtgcagatgatccgtggcaCTCGACGACTAAGGAAGGCG	For the generation of transgenic materials and characterization of editing genotypes in B. distachyon (ecotype Bd21-1).
BdRPM1-sgRNA-RP1	gctatttctagctctaaaacCGCCTTCCTTAGTCGTCGAG
BdRPM1-sgRNA-FP2	tgtgcagatgatccgtggcaAGCTCCTCCGCGCGTTCCTC
BdRPM1-sgRNA-RP2	gctatttctagctctaaaacGAGGAACGCGCGGAGGAGCT
BdRPM1-CAS9-F	ATGGCGGAAATGATCGCGA
BdRPM1-CAS9-R	TCGTTAATGTCCCACGGCATGC
