# Supplementary material for: A Fusarium graminearum effector protein subverts plant immunity by targeting the TaRPM1–TaHSA32 regulatory axis
Source: Research Square preprint supplement (doi:10.21203/rs.3.rs-8477788/v1), 2026-01-07
Supplement: Supplementary file 1 [file 21ef0dd48c73cc50c706e9ba.pdf]

1 **A *Fusarium graminearum* effector protein subverts plant immunity by targeting the**  
2 **TaRPM1–TaHSA32 regulatory axis**  
3 **Supplementary Figure**

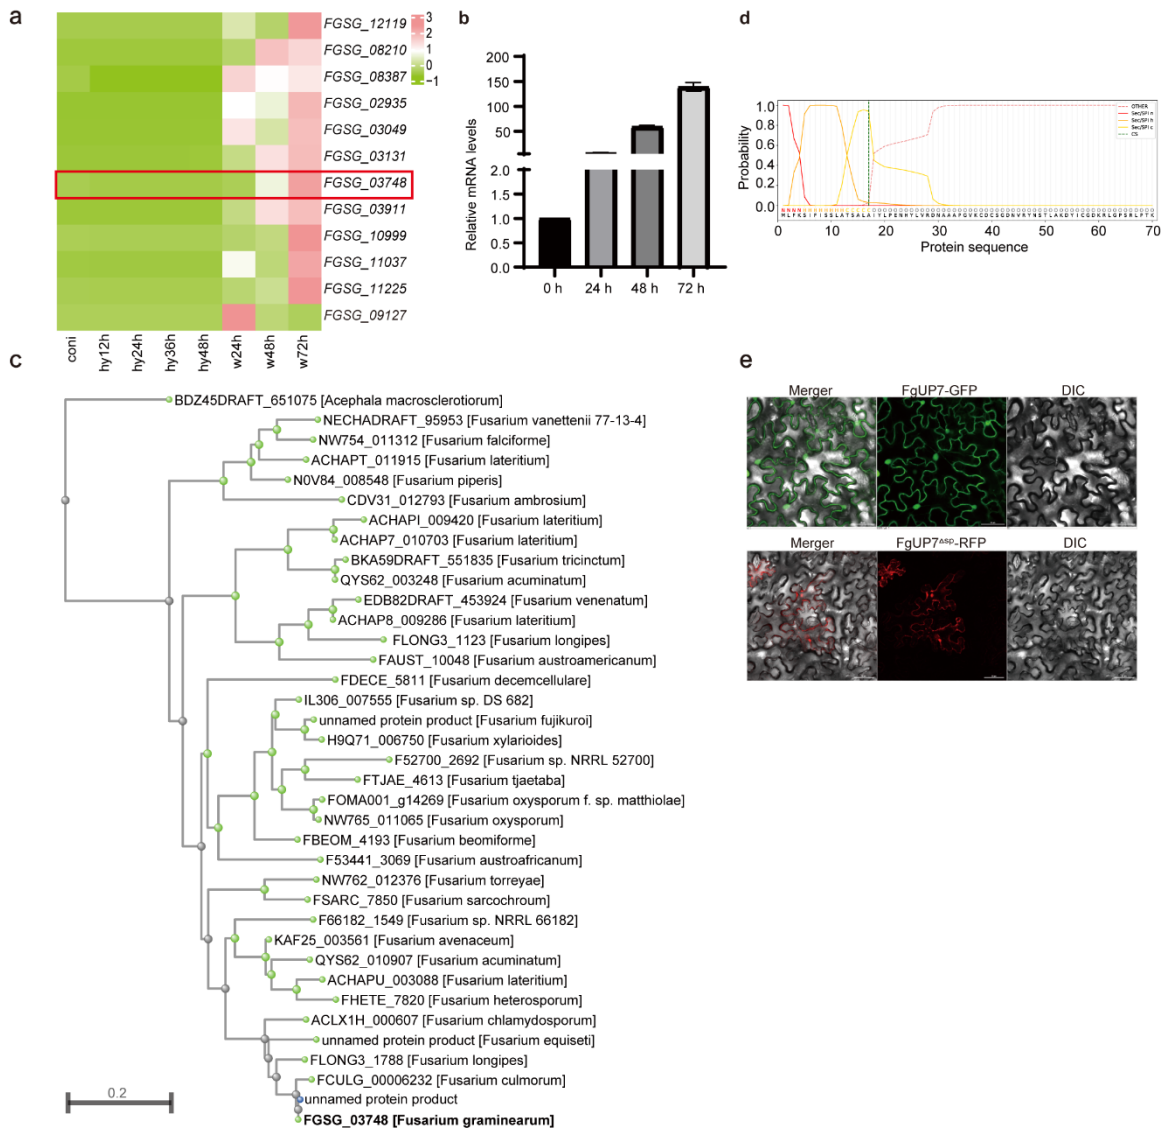

4  
5 **Supplementary Fig. 1 Identification of putative candidate effectors from *F.***  
6 ***graminearum*.**

7 **(a)** The expression of *F. graminearum* effectors candidates at different infection time  
8 points (12, 24, 48, and 72 hpi). The mean expression levels (n=3), presented as log<sub>2</sub>-  
9 transformed transcripts per million (TPM) values, were used to generate a heatmap using  
10 TBtools.

11 **(b)** Transcript levels of *FgUP7* during *F. graminearum* infection of wheat heads (0, 24,  
12 48 and 72 hpi). *FgActin* was used as the internal reference gene. Standard deviation and  
13 mean fold changes from three biological replicates. The asterisk indicates a significant  
14 difference compared with the sample at 0 hpi (one-tailed Student's t test).

15 **(c)** Phylogenetic analysis of FgUP7 orthologs. The phylogenetic tree was constructed  
16 with MEGA7 using neighbor-joining methods. The scale bar corresponds to a genetic  
17 distance of 0.02.

18 **(d)** The signal peptide of FgUP7 was predicted by Signa-IP 6.0.

19 **(e)** The localization of FgUP7 and FgUP7<sup>ΔSP</sup> was achieved by infecting *N. benthamiana*  
20 leaves with *A. tumefaciens* strains containing FgUP7 and FgUP7<sup>ΔSP</sup>. Fluorescence signals  
21 were detected at 48 hpi. Bar, 50 μm.

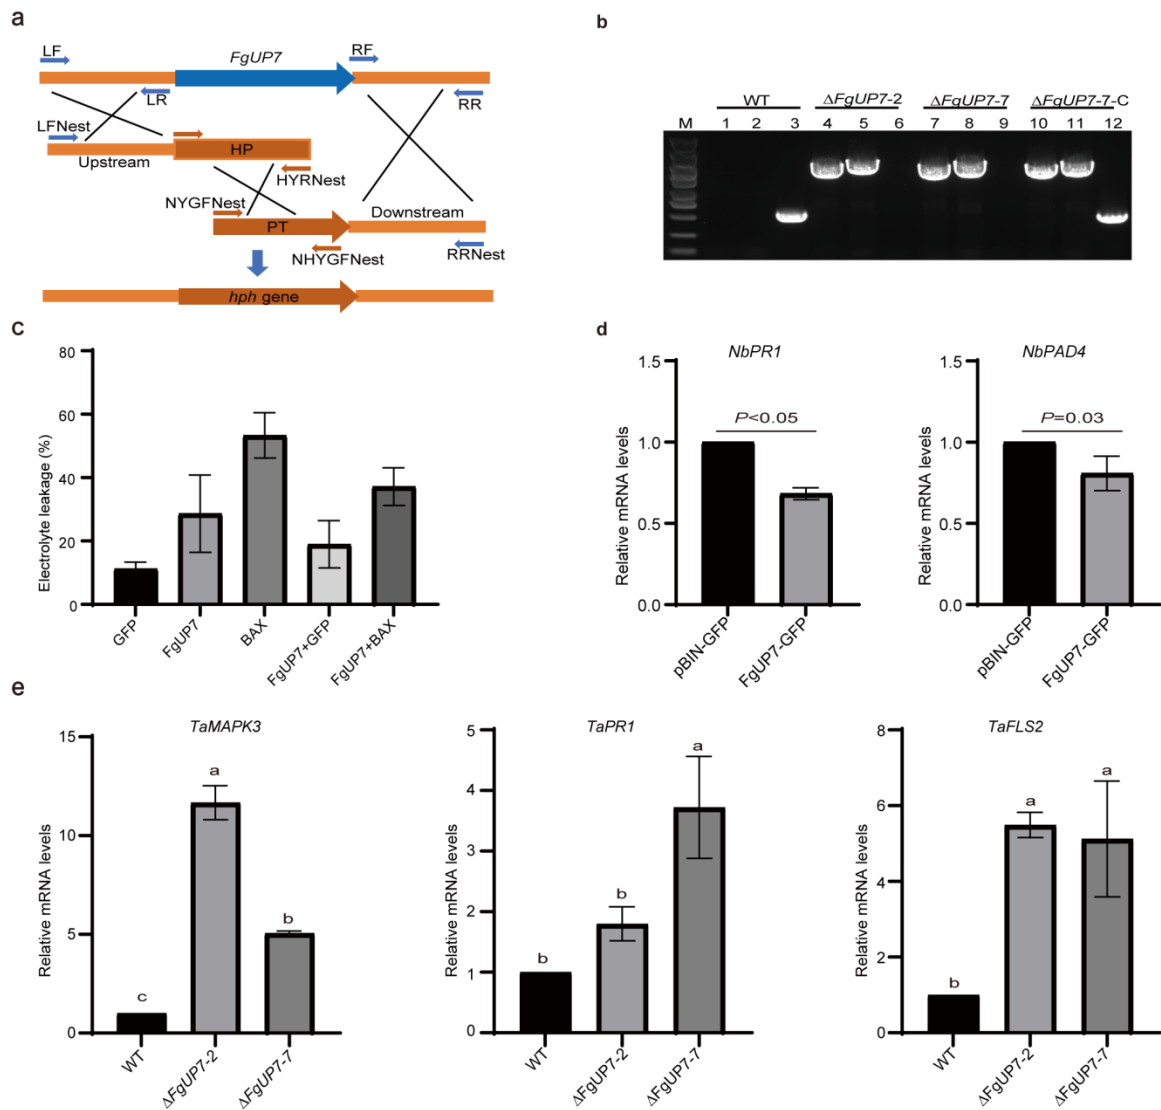

**Supplementary Fig. 2 Confirmation of *F. graminearum* effector candidate (FgUP7) mutants and the plant basal defense gene expression.**

**(a)** Schematic diagram showing the construction of homologous recombination of the gene knockout box.

**(b)** (1) upstream region of *FgUP7* was determined using LF/HYGR primers in lanes 1, 4, 7, and 10; (2) downstream sequence of *FgUP7* was detected using HYGF/RR primers in lanes 2, 5, 8, and 11; (3) partial sequence of *FgUP7* was amplified using UP7F/UP7R primers in lanes 3, 6, 9, and 12; M: DL5000 marker.

31 **(c)** Suppression of Bax-induced ion leakage by transiently expressed FgUP7 in leaves of  
32 4-wk-old *N. benthamiana* plants.

33 **(d)** The expression levels of *NbPRI* and *NbPAD4* were analyzed by RT-qPCR after  
34 transient expression of GFP (control) and FgUP7 in leaves of *N. benthamiana* plants. The  
35 values are represented by means  $\pm$  SD from three biological replicates (one-tailed  
36 Student's *t*-test).

37 **(e)** Relative expression levels of *TaMAPK3*, *TaPRI* and *TaFLS2* in WT and FgUP7  
38 deletion mutant during wheat head infection. The values are represented by means  $\pm$  SD  
39 from three biological replicates (one-way ANOVA test).

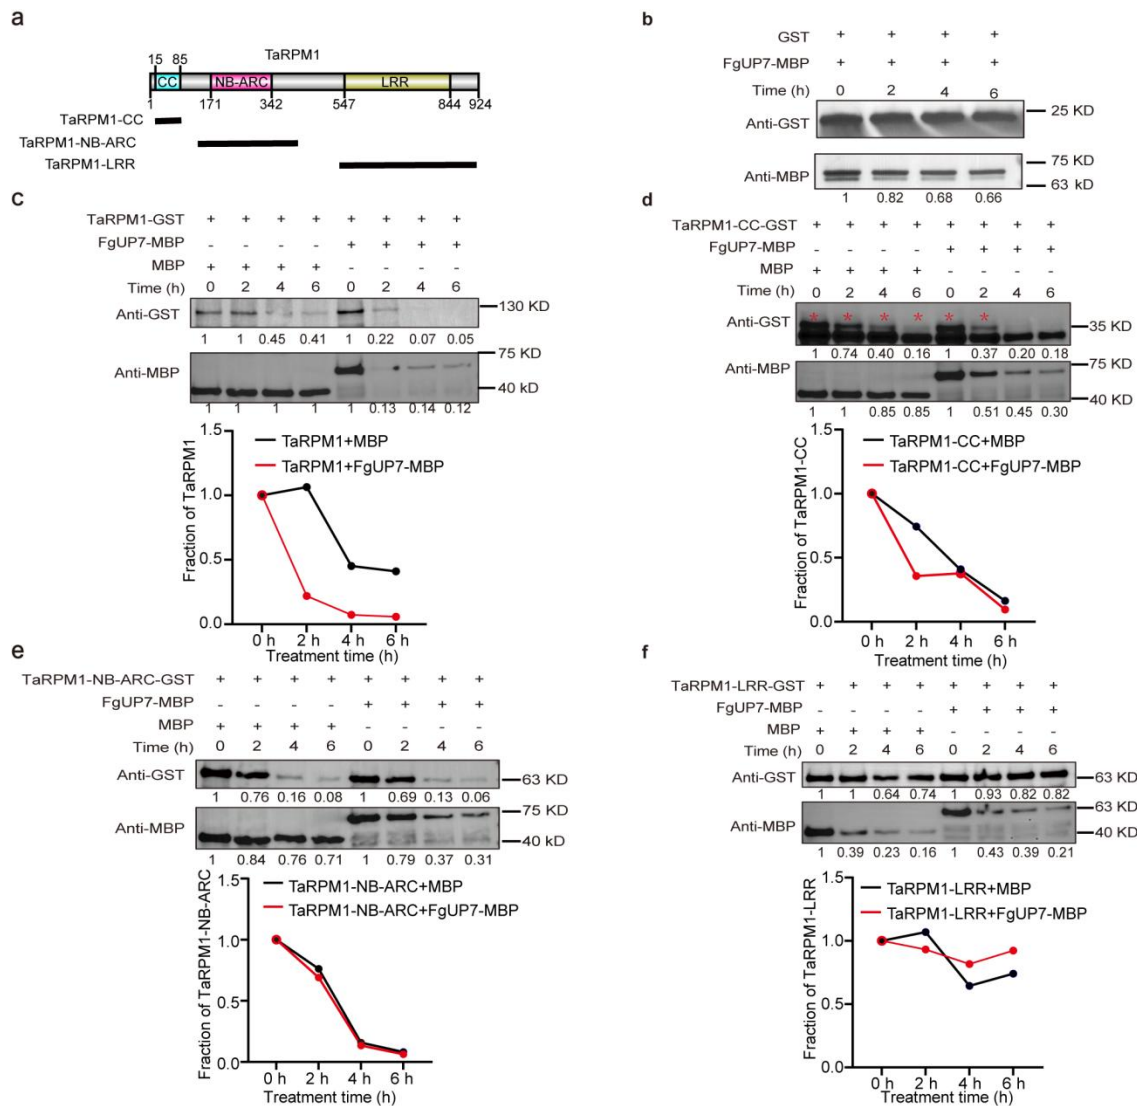

**Supplementary Fig. 3 Schematic representation of TaRPM1 protein domain architecture and FgUP7-mediated degradation of TaRPM1.**

**(a)** Diagram of TaRPM1 domain truncations.

**(b-f)** In vitro degradation assays examining the effect of FgUP7 on full-length TaRPM1 and its truncated proteins. MBP-FgUP7 was co-incubated with GST **(b)**, GST-TaRPM1 **(c)**, GST-TaRPM1-CC **(d)**, GST-TaRPM1-NB-ARC **(e)**, or GST-TaRPM1-LRR **(f)** at 37°C for 0, 2, 4, and 6 hours. Protein levels were detected using anti-MBP and anti-GST antibodies.

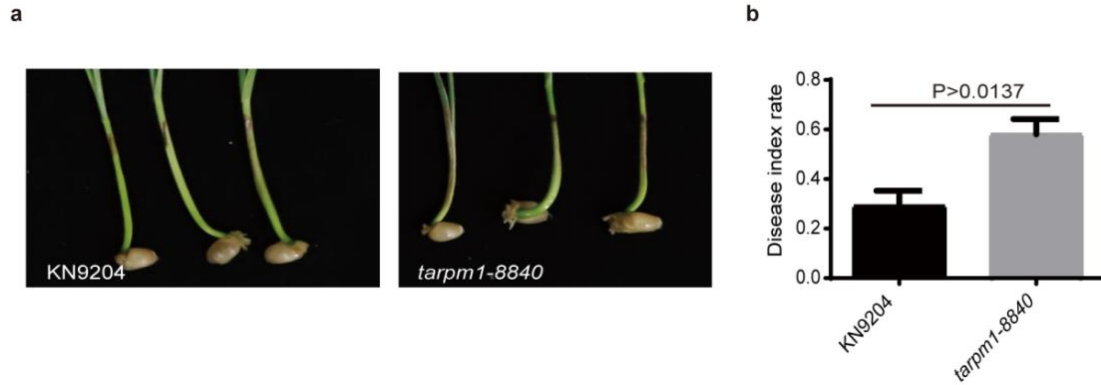

**Supplementary Fig. 4 The KN9204 mutant of TaRPM1 confers susceptibility to *F. graminearum*.**

**(a)** Disease symptoms on coleoptiles of the *knrpm1*-8840 mutant at 5 days post-inoculation with the wild-type *F. graminearum* strain.

**(b)** Distribution of disease indices on coleoptiles of the *knrpm1*-8840 mutant at 5 days post-inoculation with the wild-type *F. graminearum* strain. Data are from three independent experiments.

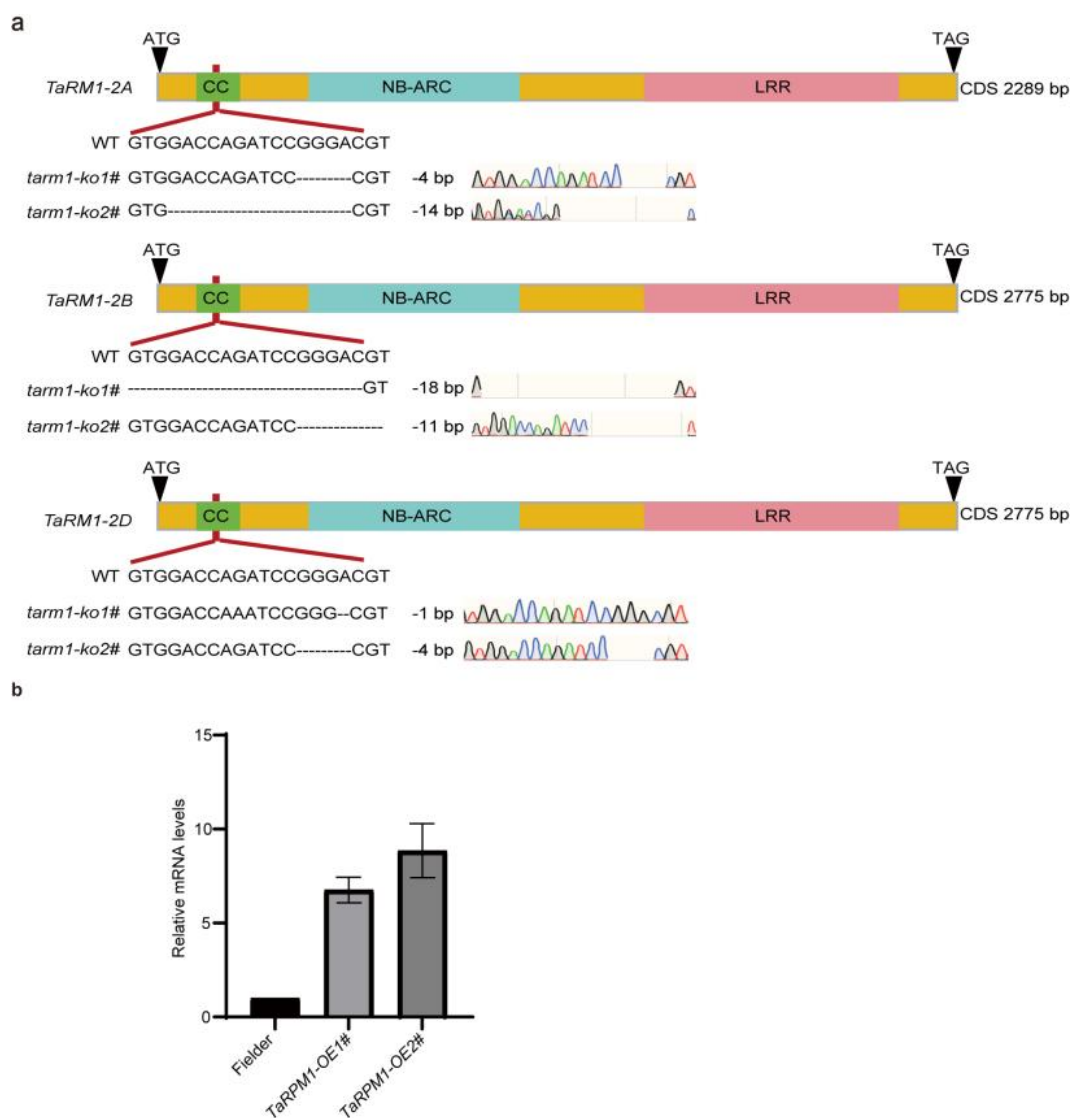

**Supplementary Fig. 5 Editing types and expression levels of *TaRPM1* transgenics.**

**(a)** CRISPR/Cas9-mediated gene editing of *TaRPM1*. Mutations of *TaRPM1* from individual editing lines (KO1#, KO2#) were confirmed by DNA sequencing and are presented as chromatographs. The number followed by chromatographs represents the nucleotide change (-, nucleotides missing).

**(b)** The expression levels in T3 generation *TaRPM1* overexpressing lines (OE1# and OE2#) were determined by RT-qPCR. Data represent mean  $\pm$  s.e.m (n = 3).

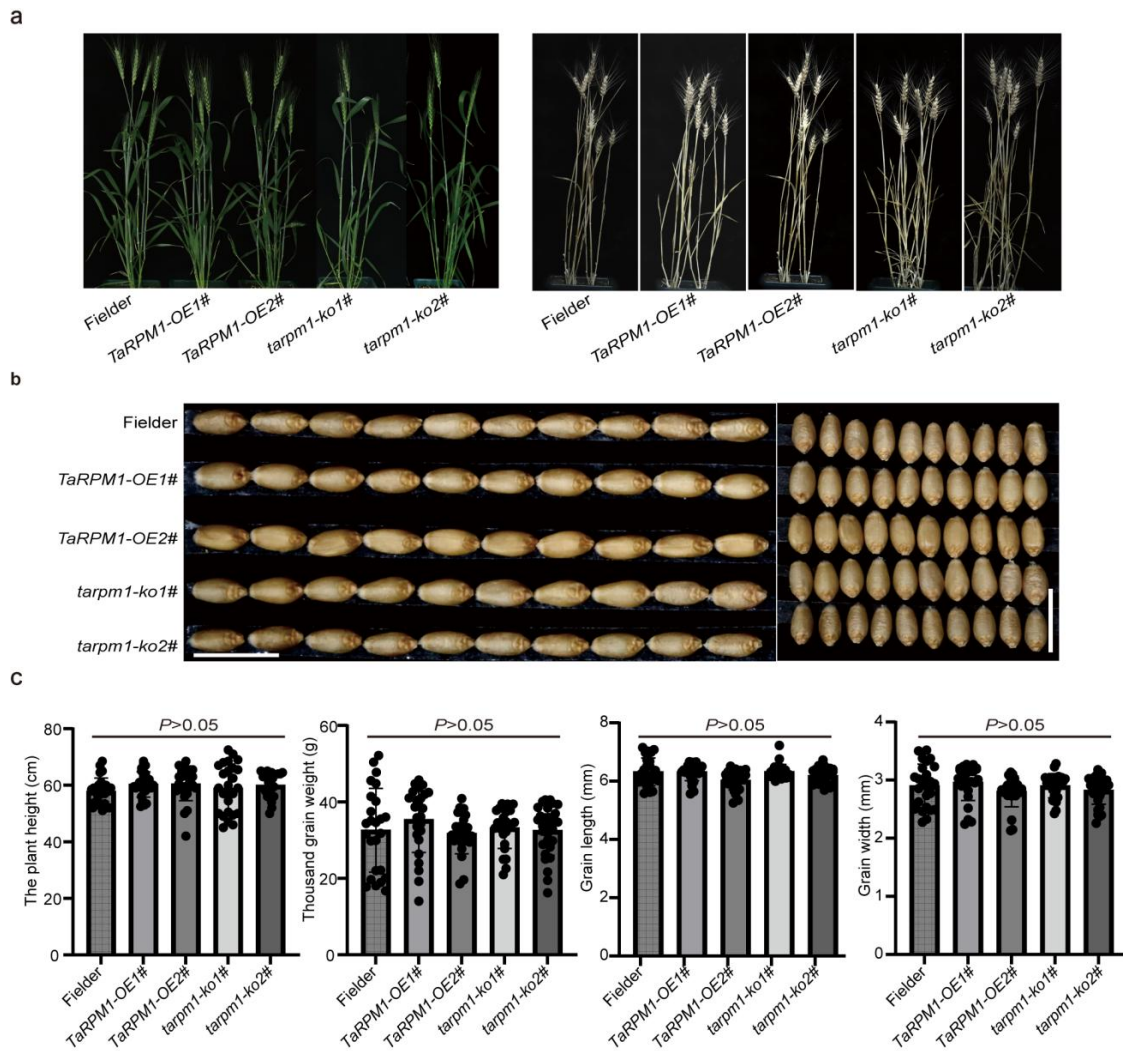

**Supplementary Fig. 6 Overexpression of *TaRPM1* has no significant effect on the agronomic traits of wheat.**

**(a)** Representative images of Fielder, *TaRPM1*-OE, and *TaRPM1*-KO plants at the flowering stage and mature stage.

**(b)** Seed shape of Fielder, *TaRPM1*-OE, and *TaRPM1*-KO plants at the kernel ripe stage. Bar, 1 cm.

**(c)** Time to heading, plant height, thousand-grain weight, weight grain width, and grain length of Fielder, *TaRPM1*-OE, and *TaRPM1*-KO plants. Values represent the means  $\pm$  SD from at least three independent replicates. All the data were compared to that of wild-type Fielder using a one-way ANOVA test. In the box plots: center line, median; box, interquartile range; whiskers,  $1.5 \times$  interquartile range; and point, the data for agronomic traits.



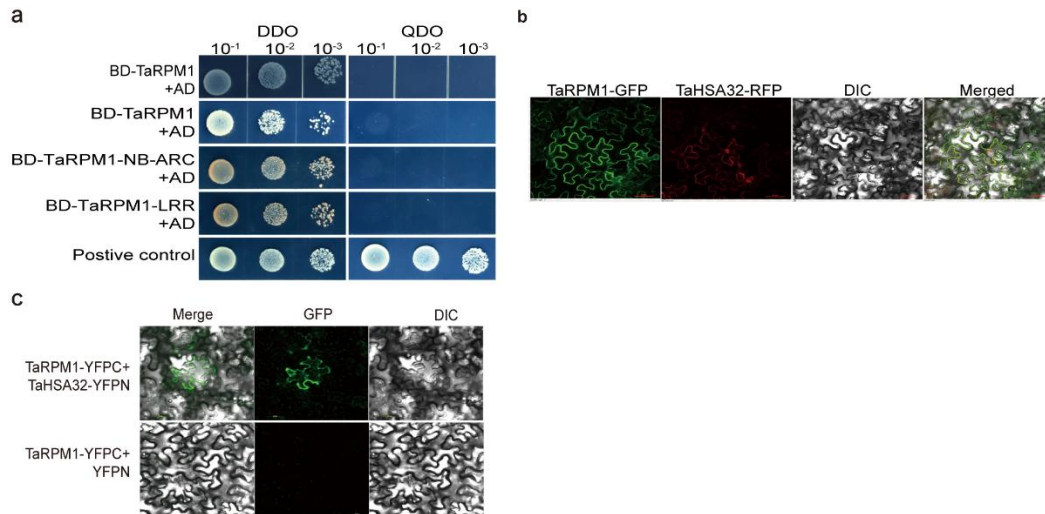

### Supplementary Fig. 7 TaRPM1 interacts with TaHSA32.

**(a)** Yeast two-hybrid assays showed no interaction between the empty AD vector and TaRPM1 or its domains (CC, NB-ARC, LRR), confirming that these constructs serve as negative controls. Transformants were grown on DDO (SD/-Trp/-Leu) and QDO (SD/-Trp/-Leu/-His/-Ade) media.

**(b)** Co-localization of TaRPM1 and TaHSA32. *N. benthamiana* leaves were infiltrated with a mixture of *A. tumefaciens* strains co-expressing the indicated constructs. Fluorescence signals were detected at 48 hpi. Bar, 50  $\mu$ m.

**(c)** Interaction between TaRPM1 and TaHSA32 was detected using BiFC assays. *N. benthamiana* leaves were infiltrated with a mixture of *A. tumefaciens* strains co-expressing indicated constructs. GFP signals were detected at 48 hpi. Bar, 50  $\mu$ m.

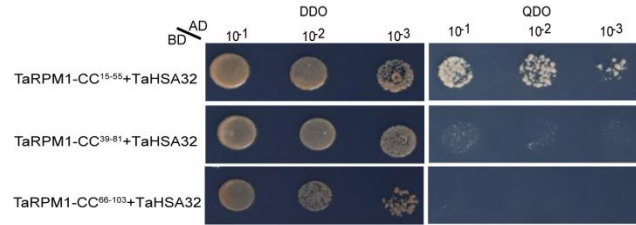

**Supplementary Fig. 8 The N-terminus of TaRPM1-CC are required for interactions with TaHSA32.**

Interaction assays of TaHSA32 with TaRPM1-CC mutants in yeast. Transformants were grown on DDO (SD/-Trp/-Leu) and QDO (SD/-Trp/-Leu/-His/-Ade) media.

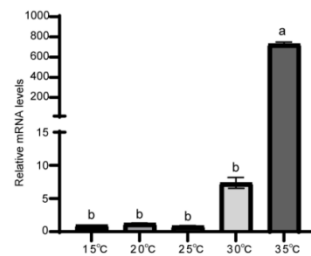

**Supplementary Fig. 9 Temperature induction of TaHSA32.**

RT-qPCR was performed to assess the transcript levels of *TaHSA32* in wheat leafs subjected to 6-hour treatments at different temperatures (15, 20, 25, 30, and 35 °C). *TaActin* was used as the internal reference gene. Values are mean  $\pm$  SD (n=3). Different letters indicate significant differences ( $P < 0.05$ ) based on one-way ANOVA and Duncan's multiple range test.

a

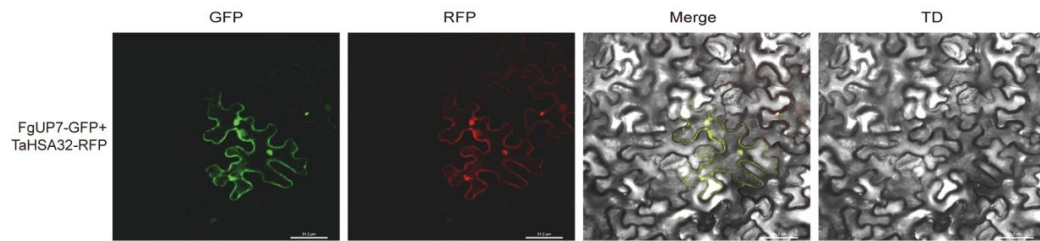

b

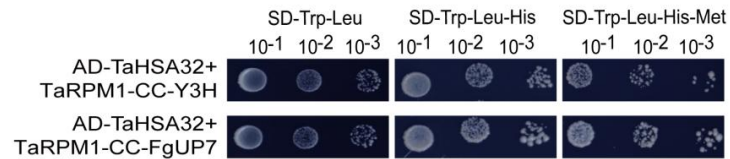

**Supplementary Fig. 10 FgUP7 and TaHSA32 are co-localized.**

**(a)** Co-localization of FgUP7 and TaHSA32 *N. benthamiana* leaves were infiltrated with a mixture of *A. tumefaciens* strains co-expressing the indicated constructs. Fluorescence signals were detected at 48 hpi. Bar, 50  $\mu$ m.

**(b)** Yeast three-hybrid assay was performed to assess TaRPM1-CC-TaHSA32 interaction in the presence or absence of FgUP7. An unlabeled TaRPM1-CC construct was used as a control.

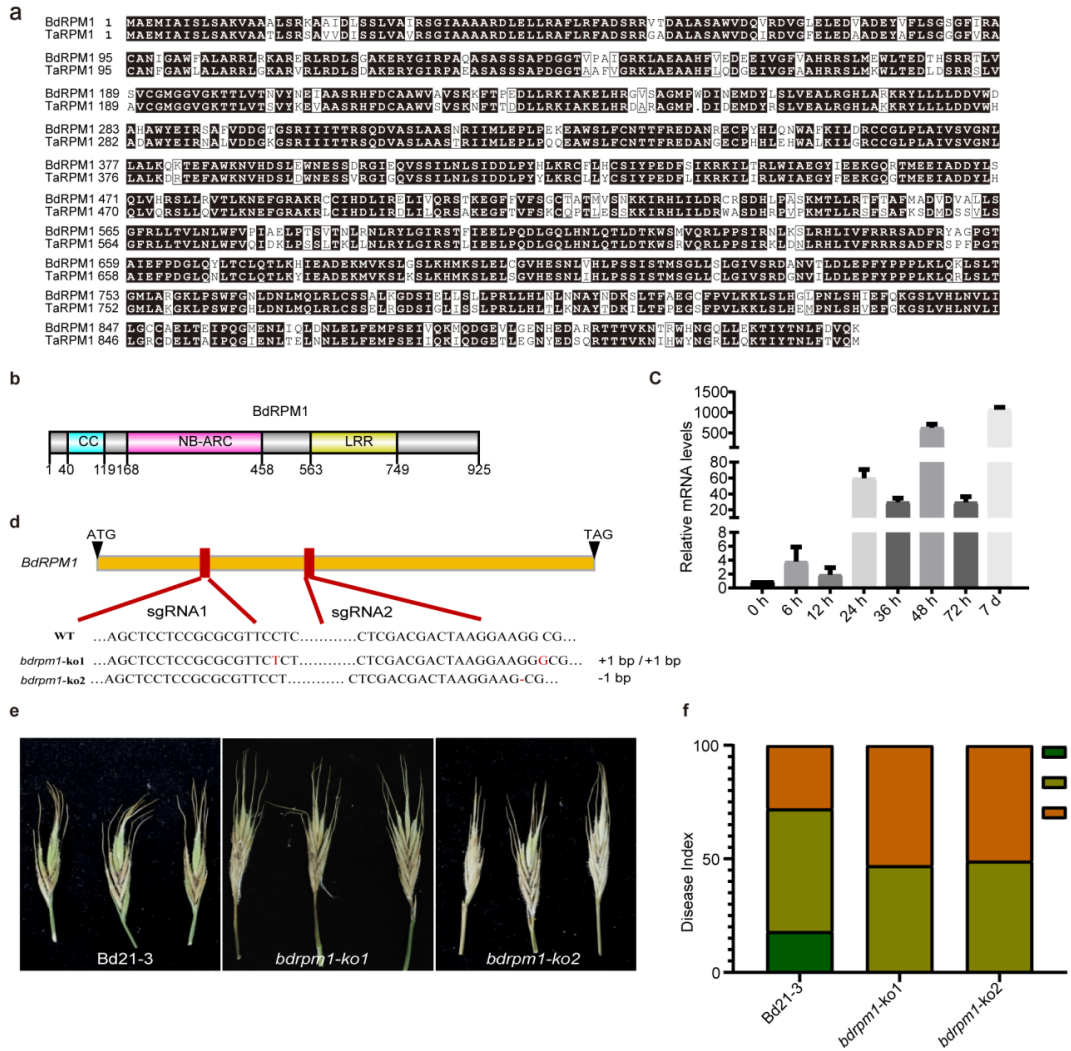

**Supplementary Fig. 11 BdRPM1 positively regulates *B. distachyon* resistance to *F. graminearum*.**

**(a)** Protein homology alignment between TaRPM1 and BdRPM1;

**(b)** Schematic diagram of the protein structure of BdRPM1;

**(c)** RT-qPCR analysis of BdRPM1 induction by *F. graminearum* infection. Expression levels were normalized to the non-inoculated spike tissues of Bd21-3 at 3 days (set as 1), with *BdTUA6* used as the internal reference gene. Data are from three biological replicates;

**(d)** CRISPR/Cas9-mediated gene editing of *BdRPM1*. Mutations in *BdRPM1* from individual edited lines (ko1, ko2) were confirmed by DNA sequencing. Numbers indicate

nucleotide changes (–, nucleotide deletion; +, nucleotide insertion). **e** Representative images of Bd21-3 and *bdrpm1*-ko spikes inoculated with the wild-type strain of *F. graminearum*, photographed at 7 days post-inoculation (dpi); **(f)** Disease index distribution in Bd21-3 and *bdrpm1*-KO spikes at 10 dpi after inoculation with the wild-type strain of *F. graminearum*, determined from three independent experiments.

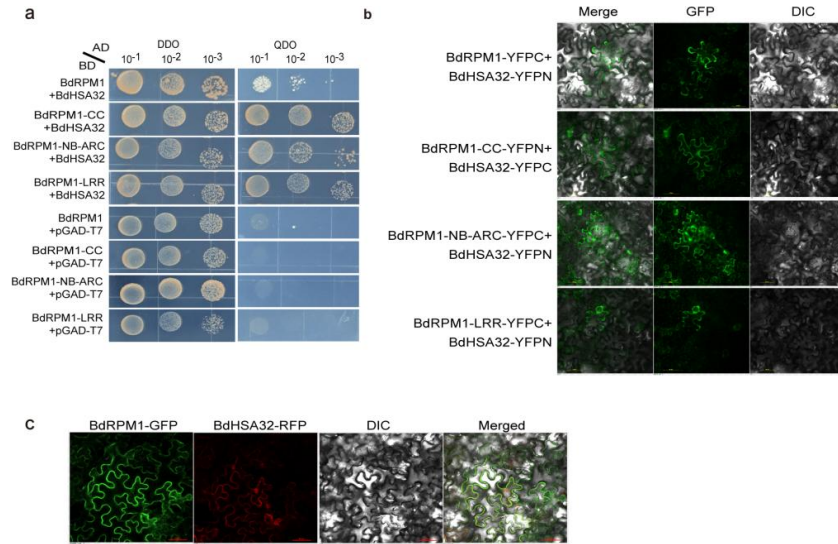

## Supplementary Fig. 12 Bdrpm1 interacts with BdHSA32.

**(a)** Yeast two-hybrid assays revealed an interaction between Bdrpm1 (or its individual domains: CC, NB-ARC, and LRR) and BdHSA32. No interaction was observed between the empty AD vector and Bdrpm1 or its domains (CC, NB-ARC, LRR), confirming that these domains served as negative controls. Transformants were cultured on DDO (SD/-Trp/-Leu) and QDO (SD/-Trp/-Leu/-His/-Ade) media.

**(b)** Interaction between Bdrpm1 (and its truncations Bdrpm1-CC, -NB-ARC, and -LRR) and BdHSA32 was detected using BiFC assays. *N. benthamiana* leaves were infiltrated with a mixture of *A. tumefaciens* strains co-expressing indicated constructs. GFP signals were detected at 48 hpi. Bar, 50  $\mu$ m.

**(c)** Co-localization of Bdrpm1 and BdHSA32. *N. benthamiana* leaves were infiltrated with a mixture of *A. tumefaciens* strains co-expressing the indicated constructs. Fluorescence signals were detected at 48 hpi. Bar, 50  $\mu$ m.
